# Supplementary material for: Colorimetric paper-based test strip for detection of methylparaben in nonconforming health care products
Source: Royal Society of Chemistry journal article supplement (doi:10.1039/d6ra00484a), 2026-05-11
Supplement: d6ra00484a1.pdf [file d6ra00484a1.pdf]

## Supplementary material

### Colorimetric Paper-Based Test Strip for Detection of Methylparaben in Nonconforming Health Care Products

Aya M. El-Hassanein<sup>1</sup>, Sherin F. Hammad<sup>1</sup>, Fotouh R. Mansour<sup>1,2</sup>, and Aya A. Abdella<sup>1\*</sup>

<sup>1</sup>Department of Pharmaceutical Analytical Chemistry, Faculty of Pharmacy, Tanta University, 31111, Egypt.

<sup>2</sup>Department of Medicinal Chemistry, Faculty of Pharmacy, King Salman International University (KSIU), Ras Sudr 46612, Egypt

\* Correspondence to Aya A. Abdella

[aya.atef.86@pharm.tanta.edu.eg](mailto:aya.atef.86@pharm.tanta.edu.eg), [Aya.atef.86@gmail.com](mailto:Aya.atef.86@gmail.com)

|            | A                                                                                 | B                                                                                   |
|------------|-----------------------------------------------------------------------------------|-------------------------------------------------------------------------------------|
| Drop shape |  |  |
| WCA        | 76.68°                                                                            | 43.43°                                                                              |

**Fig. S1.** Photos and water contact angle (WCA) of CS-coated paper (A) and Fe<sup>3+</sup>@CS-coated paper (B) using 100 μL distilled water.

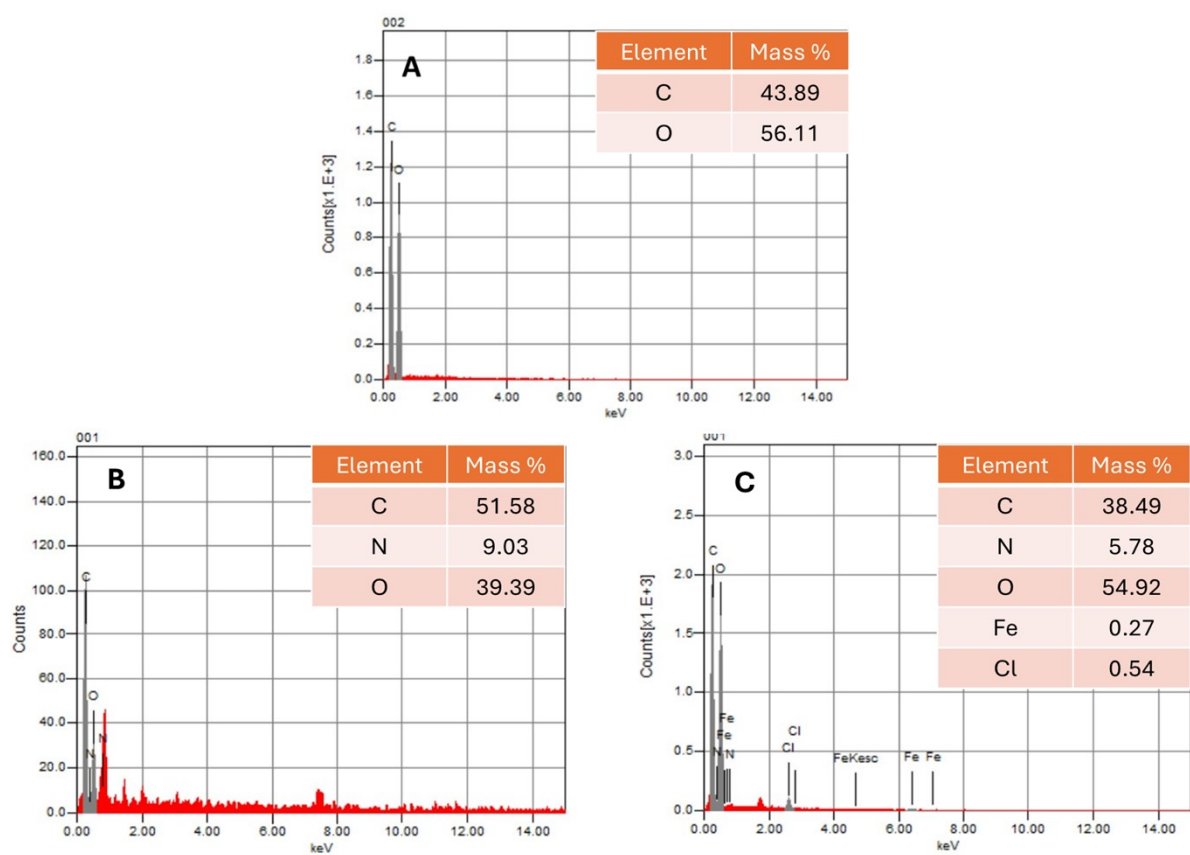

**Fig. S2.** EDX-SEM spectra of (A) uncoated paper and (B) CS-coated paper (C) Fe<sup>3+</sup>@CS-coated paper.

**Table S1.** Accuracy of the proposed test strip/ smartphone and colorimetric method for determination of the MPB

| Method                            | Conc. added (mg/mL) | Conc. found (mg/mL)<br>(n=3) | %<br>recovery | Mean % recovery $\pm$ SD |
|-----------------------------------|---------------------|------------------------------|---------------|--------------------------|
| <b>Test strip/<br/>Smartphone</b> | 30                  | 32.01                        | 106.7         | 101.44 $\pm$ 4.56        |
|                                   |                     | 29.66                        | 98.86         |                          |
|                                   |                     | 29.63                        | 98.76         |                          |
|                                   | 40                  | 39.44                        | 98.6          | 97.80 $\pm$ 0.69         |
|                                   |                     | 38.96                        | 97.4          |                          |
|                                   |                     | 38.96                        | 97.4          |                          |
|                                   | 50                  | 48.98                        | 97.96         | 100.86 $\pm$ 2.50        |
|                                   |                     | 50.97                        | 101.97        |                          |
|                                   |                     | 51.33                        | 102.66        |                          |
| <b>Colorimetry</b>                | 25                  | 25.04                        | 100.16        | 100.45 $\pm$ 0.79        |
|                                   |                     | 24.96                        | 99.84         |                          |
|                                   |                     | 25.34                        | 101.36        |                          |
|                                   | 35                  | 35.29                        | 100.83        | 99.66 $\pm$ 1.15         |
|                                   |                     | 34.49                        | 98.54         |                          |
|                                   |                     | 34.87                        | 99.63         |                          |
|                                   | 45                  | 45.11                        | 100.24        | 100.31 $\pm$ 0.64        |
|                                   |                     | 45.44                        | 100.98        |                          |
|                                   |                     | 44.87                        | 99.71         |                          |

**Table S2.** Intra- and inter-day precision results for determination of MPB using the proposed test strip/ smartphone and colorimetric methods

| Method                    | Conc. added (mg/mL) | Intraday precision                 |                                |      | Inter-day precision        |                     |                 |
|---------------------------|---------------------|------------------------------------|--------------------------------|------|----------------------------|---------------------|-----------------|
|                           |                     | Conc. found (mg/mL) $\pm$ SD (n=9) | (mg/mL) mean recovery $\pm$ SD | %RSD | Conc. found $\pm$ SD (n=9) | % recovery $\pm$ SD | Mean $\pm$ %RSD |
| Test strip/<br>smartphone | 30                  | 30.43 $\pm$ 1.36                   | 101.44 $\pm$ 4.55              | 4.55 | 29.97 $\pm$ 1.49           | 99.91 $\pm$ 1.35    | 1.36            |
|                           | 40                  | 39.12 $\pm$ 0.27                   | 97.8 $\pm$ 0.69                | 0.69 | 40.04 $\pm$ 1.96           | 100.10 $\pm$ 2.05   | 2.05            |
|                           | 50                  | 50.42 $\pm$ 1.26                   | 100.86 $\pm$ 2.53              | 2.53 | 49.97 $\pm$ 1.40           | 99.95 $\pm$ 0.81    | 0.81            |
| Colorimetry               | 25                  | 25.11 $\pm$ 1.03                   | 100.45 $\pm$ 0.79              | 0.79 | 25.04 $\pm$ 0.24           | 100.16 $\pm$ 0.24   | 0.25            |
|                           | 35                  | 34.88 $\pm$ 0.94                   | 99.66 $\pm$ 1.15               | 1.15 | 34.88 $\pm$ 0.31           | 99.68 $\pm$ 0.29    | 0.29            |
|                           | 45                  | 45.14 $\pm$ 1.22                   | 100.31 $\pm$ 0.64              | 0.64 | 45.04 $\pm$ 0.52           | 100.10 $\pm$ 0.17   | 0.18            |
